# Supplementary material
Source: MDPI journal article supplement (https://www.mdpi.com/2313-0105/8/11/234)
Supplement: s1 [file s1]

Archive with 2 entries (2 files):
- calculation example.mph
- Description.pdf
