# Supplementary material
Source: MDPI journal article supplement (https://www.mdpi.com/2313-0105/8/11/234)
Supplement: s1 [file s1 › Description.pdf]

## Program description

This is a LIBs cycle aging simulation program. which uses **version 5.6** COMSOL to establish the electrothermal coupling model of lithium-ion battery. We added side reactions such as lithium plating and SEI film growth to the model to simulate battery aging ([Component2 / liion Battery / Porous Electrode / Porous Electrode Reaction](#)).

In this calculation example, the ambient temperature is set to 10°C ([Global Definitions / Parameters / T\\_envir](#)). And the battery is charged at 3C and discharged at 1C for cyclic aging ([Component2 / liion Battery / Charge-Discharge Cycling](#)). In order to shorten the simulation time, we introduce aging factor ([Component2 / Variables / t\\_factor](#)). “t\_factor=80” means that each cycle of the simulation is equal to 80 cycles of aging.

After computing, we can see the battery capacity loss in the results ([Results / Capacity Loss \(Cycle Numbers\)](#)). Among them, there are capacity loss caused by lithium plating and SEI growth, and the total loss.
